# Supplementary material for: Interaction of full-length Tau with negatively charged lipid membranes leads to polymorphic aggregates
Source: Royal Society of Chemistry journal article supplement (doi:10.1039/d4nr01343c), 2024-01-01
Supplement: d4nr01343c1.pdf [file d4nr01343c1.pdf]

## Supplementary Information

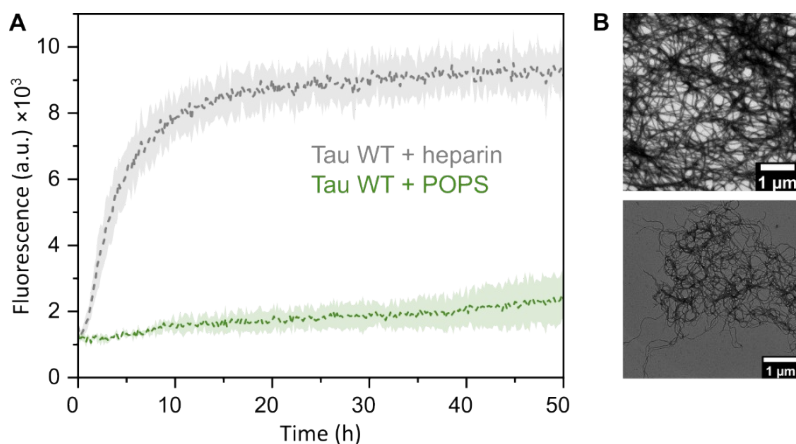

**Figure S1:** (A). The fluorescence intensity measured over time for Tau WT in the presence of heparin or POPS liposomes. (B). Electron microscopy images of Tau-P301L after incubation with heparin (up) or POPS (down)

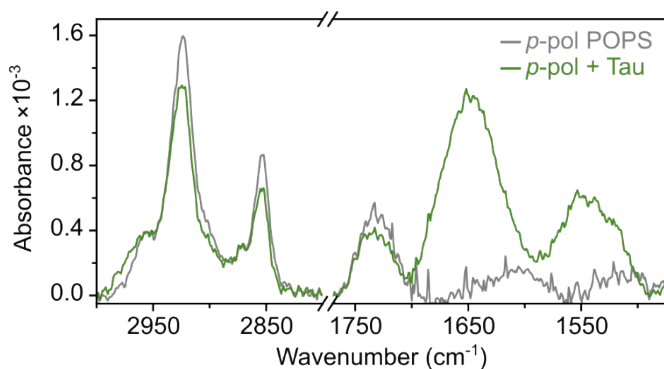

**Figure S2:** ATR-FTIR spectrum before (grey) and after (green) Tau incubation on POPS bilayer at the p (90°) polarization at 5  $\mu\text{M}$ .

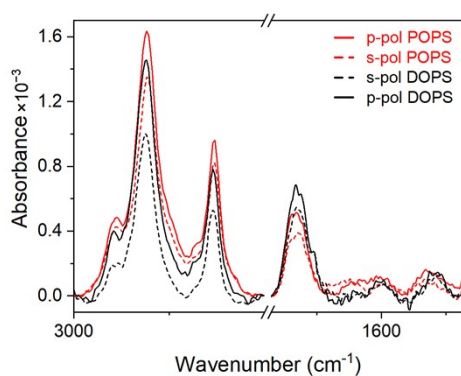

**Figure S3:** Comparison between ATR-FTIR spectra obtained on POPS (red) and DOPS bilayers (black).

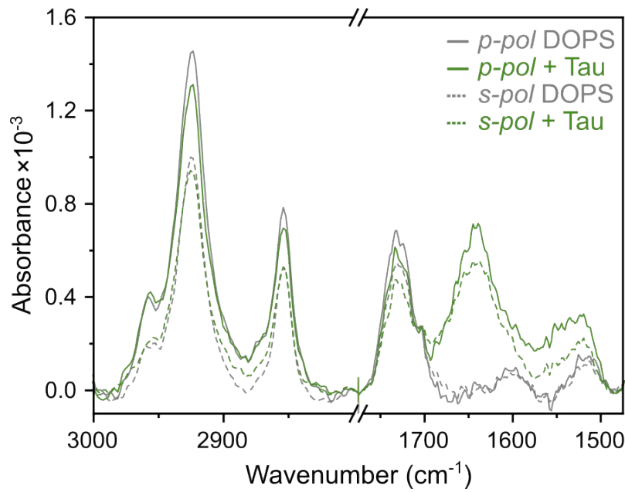

**Figure S4:** *p* and *s*-polarized ATR-FTIR spectra of a DOPS-supported lipid bilayer before (grey) and after (green) a 3-hour incubation with Tau-P301L (1  $\mu$ M) are shown in both high and low wavenumber ranges. The dashed lines correspond to the *s*-polarized ATR-FTIR spectra.

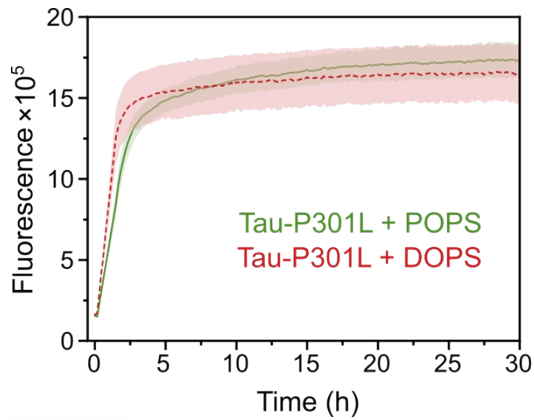

**Figure S5:** Thioflavin T fluorescence intensity measured at 485 nm over time with Tau-P301L (20  $\mu$ M) with POPS or DOPS liposomes (200  $\mu$ M)

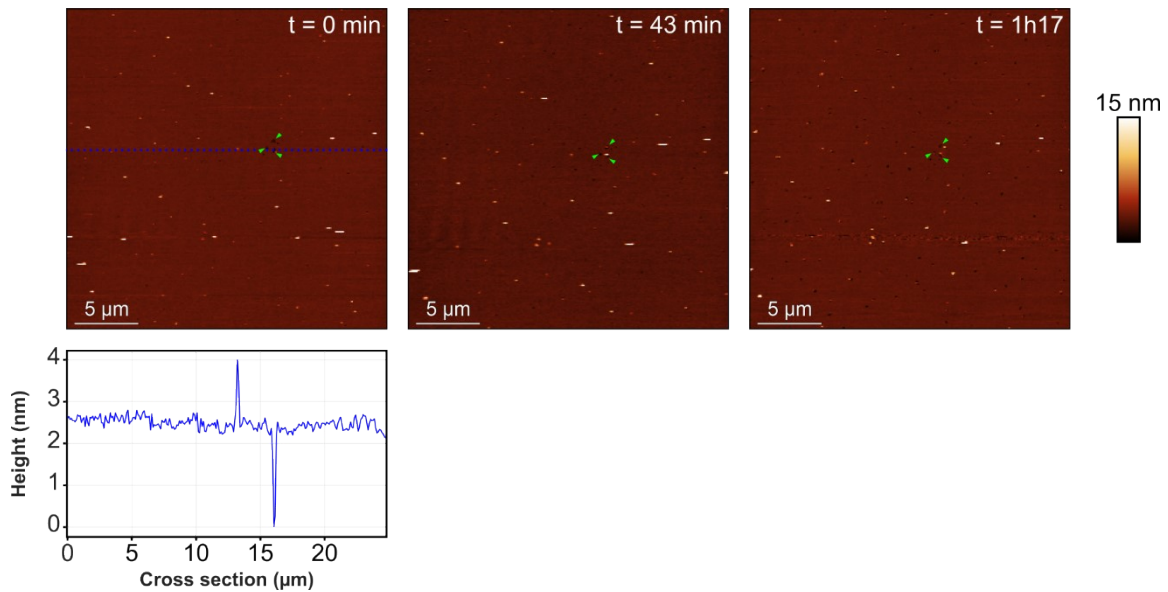

**Figure S6:** AFM image of a DOPS SLB over time. The same area of the DOPS bilayer was imaged over time to check its integrity. A defect in the SLB, indicated by green arrowheads, allowed the determination of the thickness of the bilayer, which is about 3nm.

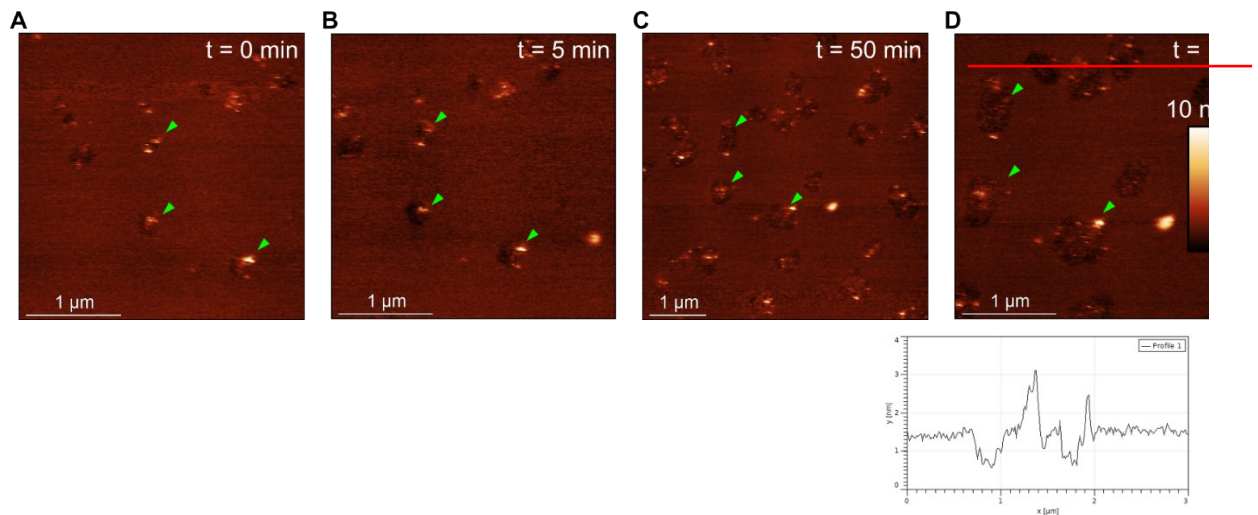

**Figure S7:** DOPS supported lipid bilayer before (A) and after 5 min (B), 50 min (C) and 1h (D) of injection of 300 nM of Tau-P301L. Green arrows follow defect widening over time. A cross section of panel D allows measuring the depth of defects after 1 h.

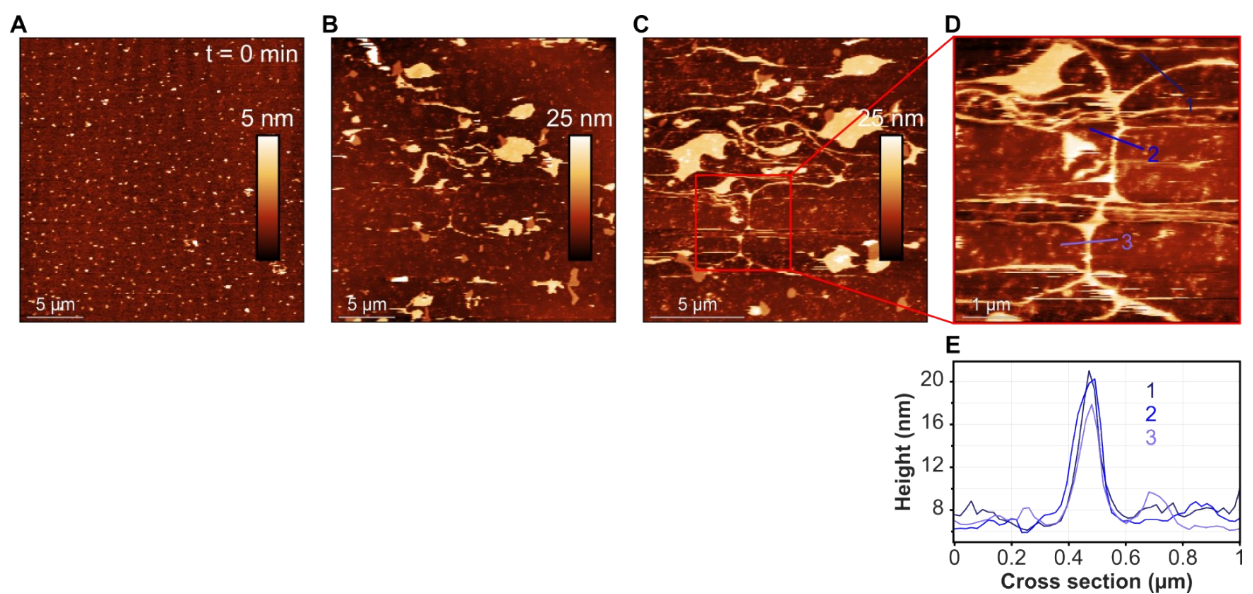

**Figure S8:** DOPS supported lipid bilayer before injection (A) and after incrementing the concentration of Tau-P301L, at 400 nM and an incubation of 30 mn - 1h (B), and at a final concentration of 500 nM on a 1-hour timescale (C). Zoom in on the fibrillar structures of C (D) and cross-sections of three of them (E).
